# Supplementary material
Source: Springer Nature journal article supplement (https://www.springermedizin.de/resource/supplementary/13063_2013_1914_MOESM3_ESM.pdf/9621244)

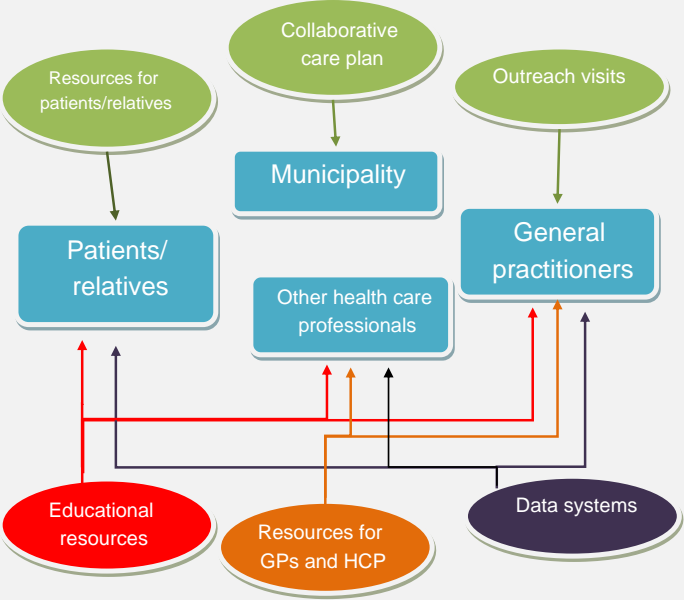

Supplement: MOESM3 [file 9621244]
